# Supplementary material
Source: publisher site journal article supplement (https://www.dovepress.com/article/367339)
Supplement: Supplementary file 1 [file get_supplementary_file.php]

**Supplementary Tables 1 Systematic review methodology for COVID-19 LSR**

| **Author** | **Clinical topic** | **Patients** | **Update** | **Type of LSR** | **Methods of data synthesis** | **Quality assessment tool** |
| --- | --- | --- | --- | --- | --- | --- |
| Siemieniuk1 | Treatment | I | 🗸 | 1 | Bayesian | ROB2.0/GRADE |
| Wynants2 | Others | I | 🗸 | 3 | / | PROBAST |
| Allotey3 | Clinical manifestation | III | 🗸 | 2 | Traditional meta-analysis methods | NOS |
| Allotey4 | Epidemic spread | III | 🗴 | 2 | Traditional meta-analysis methods | Assessing risk of bias in prevalence studies: modification of an existing tool and evidence of interrater agreement |
| Bartoszko5 | Prevention | I | 🗴 | 2 | Bayesian | ROB2.0/GRADE |
| Siemieniuk6 | Treatment | I | 🗴 | 1 | Bayesian | ROB2.0/GRADE |
| Hernandez7 | Treatment and prevention | I | 🗴 | 3 | / | ROBINS-I/ROB2.0 |
| Wilt8 | Treatment | I | 🗸 | 2 | Traditional meta-analysis methods | Risk of bias was assessed using a modified approach developed by Cochrane |
| Mackey9 | Treatment | I | 🗴 | 3 | / | NOS |
| Helfand10 | Prognosis | I | 🗴 | 2 | Bayesian | JBI/GRADE |
| Schünemann11 | Treatment | I | 🗴 | 2 | Traditional meta-analysis methods | NOS/ROB2.0/AMSTAR 2/GRADE |
| Brümmer12 | Diagnosis | I | 🗸 | 2 | Traditional meta-analysis methods | QUADAS-2 |
| Buitrago-Garcia13 | Epidemic spread | I | 🗴 | 2 | Traditional meta-analysis methods | JBI/ Guidelines for Evaluating Prevalence Studies/ Questionnaire to Assess Relevance and Credibility of Modeling Studies for Informing Health Care Decision Making: An Ispor-AmcpNpc Good Practice Task Force Report |
| Juul14 | Treatment | I | 🗸 | 1 | Trial Sequential Analysis | ROB2.0/GRADE |
| Schlesinger15 | Etiology | I | 🗴 | 2 | Traditional meta-analysis methods | QUIPS/GRADE |
| Davidson16 | Treatment | I | 🗴 | 2 | Traditional meta-analysis methods | ROB2.0/GRADE |
| Ansems17 | Treatment | I | 🗴 | 2 | Traditional meta-analysis methods | ROB2.0/GRADE |
| Deeks18 | Diagnosis | I | 🗴 | 2 | Traditional meta-analysis methods | QUADAS-2 |
| Ghosn19 | Treatment | I | 🗴 | 2 | Traditional meta-analysis methods | ROB2.0/GRADE |
| Salameh20 | Diagnosis | I | 🗸 | 2 | Traditional meta-analysis methods | QUADAS-2 |
| Kreuzberger21 | Treatment | I | 🗴 | 3 | Traditional meta-analysis methods a | ROB2.0 |
| Mikolajewska22 | Treatment | I | 🗴 | 3 | Traditional meta-analysis methods a | ROB2.0 |
| O'Byrne23 | Treatment | I | 🗴 | 3 | Trial Sequential Analysis a | ROB2.0/GRADE |
| Valk24 | Treatment | I | 🗸 | 3 | / | ROB2.0/GRADE/ROBINS-I/NRSI |
| Stroehlein25 | Treatment | I | 🗴 | 3 | / | ROB2.0/GRADE |
| Griesel26 | Treatment | I | 🗴 | 2 | Traditional meta-analysis methods | ROB2.0/GRADE |
| Wagner27 | Treatment | I | 🗴 | 2 | Traditional meta-analysis methods | ROB2.0/GRADE |
| Webster28 | Prevention | I | 🗴 | 2 | Trial Sequential Analysis | ROB2.0/GRADE |
| Qiu29 | Epidemic spread | I | 🗴 | 2 | Traditional meta-analysis methods | JBI（adapted version） |
| Langford30 | Prevalence | I | 🗴 | 2 | Traditional meta-analysis methods | self-made question |
| Tleyjeh31 | Treatment | I | 🗸 | 2 | Traditional meta-analysis methods | RoB 2/ROBINS-I |
| Amer32 | Others | I | 🗴 | 3 | / | / |
| Harder33 | Prevention | V | 🗴 | 3 | / | RoB 2/ROBINS-I/GRADE |
| Harder34 | Prevention | V | 🗴 | 3 | / | RoB 2/ROBINS-I/GRADE |
| Santos35 | Clinical manifestation | I | 🗸 | 2 | Traditional meta-analysis methods | JBI/GRADE |
| Hussain36 | Prevalence | I | 🗴 | 2 | Traditional meta-analysis methods | JBI/GRADE |
| Elvidge37 | Others | I | 🗴 | 3 | / | NICE economic evaluation checklist |
| Centeno-Tablante38 | Epidemic spread | II and III | 🗴 | 3 | / | GRADE |
| Michelen39 | Clinical manifestation | I | 🗴 | 2 | Traditional meta-analysis methods | Hoy et al checklist |
| Kirkham40 | Treatment | I | 🗴 | 2 | Traditional meta-analysis methods | ROB 2.0/ROBINS I/EBM for case series |
| Zhang41 | Treatment | I | 🗴 | 2 | Traditional meta-analysis methods | ROB2.0/NOS |
| Gómez-Ochoa42 | Clinical manifestation、Prevalence、Etiology | VI | 🗴 | 2 | Traditional meta-analysis methods | JBI |
| Dong43 | Clinical manifestation | I | 🗴 | 2 | Traditional meta-analysis methods | the list of 11 items recommended by Agency for Healthcare Research and Quality(AHRQ)(Rostom et al., 2004) |
| Xu44 | Epidemic spread | II | 🗸 | 2 | Traditional meta-analysis methods | NOS |
| Bonardi45 | Treatment | V | 🗴 | 3 | / | Template for Intervention Description and Replication (TIDieR) checklist/ROB2.0 |
| Asiimwe46 | Clinical manifestation | I | 🗴 | 2 | Traditional meta-analysis methods | Modified Oxford Centre |
| Bell47 | Clinical manifestation | VI | 🗴 | 2 | Traditional meta-analysis methods | NOS |
| Soto-Cámara48 | Clinical manifestation | VI | 🗴 | 3 | / | JBI |
| Yang49 | Clinical manifestation | II and III | 🗸 | 2 | Traditional meta-analysis methods | NOS |
| Korang50 | Prevention | V | 🗸 | 1 | Trial Sequential Analysis | ROB2.0/GRADE |
| Melo51 | Others | I | 🗴 | 2 | Traditional meta-analysis methods | NOS/GRADE |
| Ceravolo52 | Prognosis | I | 🗸 | 3 | / | ROB2.0/ROBINS/ocEbM 2011 levels of Evidence table |
| Dzinamarira53 | Etiology | VI | 🗴 | 2 | Traditional meta-analysis methods | The NIH Quality Assessment Tool for Observational Cohort and Cross-Sectional Studies/GRADE |
| Silveira54 | Clinical manifestation | I | 🗴 | 3 | / | JBI |
| Cares-Marambio55 | Prevalence | I | 🗴 | 2 | Traditional meta-analysis methods | corresponding assessment tools recommended by the National Heart, Lung, and Blood Institute (NHLBI) |
| Bwire56 | Epidemic spread | II | 🗴 | 3 | / | / |
| Rocha57 | Prognosis | I | 🗴 | 3 | / | QUIPS |
| Baladia58 | Treatment | I | 🗴 | 3 | / | ROBINS-I/ROB2.0/GRADE |
| John59 | Clinical manifestation | V | 🗸 | 3 | / | ROBINS-I / ROBINS-E |
| Maguire60 | Others | I | 🗴 | 3 | / | Oxford Centre for Evidence-Based Medicine 2011 Levels of Evidence |
| Rada61 | Treatment | I | 🗴 | 3 | / | ROBINS-I/ROB2.0/GRADE |
| Verdejo62 | Treatment | I | 🗴 | 2 | Traditional meta-analysis methods | ROB2.0/GRADE |
| Verdugo-Paiva63 | Treatment | I | 🗴 | 2 | Traditional meta-analysis methods | ROB2.0/GRADE |
| Verdugo-Paiva64 | Treatment | I | 🗴 | 2 | Traditional meta-analysis methods | ROBINS-I/ROB2.0/GRADE |

Study object（I：General patients with COVID-19, II: Children patients with COVID-19, III：Pregnant patients with COVID-19, IV: Elderly patients with COVID-19, V: Healthy people， VI：Health care workers）

Type of LSR:（1：Living network meta-analysis， 2：Living systematic review and meta-analyses， 3：Living systematic review only）

a：A meta-analysis was not performed in this version, but will be performed in an updated version if there is sufficient evidence

**Supplementary Tables 2 COVID-19 databases/websites searched by LSR**

| **Database/website** | **Number** |
| --- | --- |
| WHO (World Health Organization) COVID-19 database | 26 |
| Living Overview of the Evidence (L-OVE) COVID-19 Database | 14 |
| The Cochrane COVID-19 Study Register | 14 |
| Systematic and Living Map on COVID-19 Evidence（https://www.nornesk.no/forskningskart/NIPH_mainMap.html） | 6 |
| Living Evidence on COVID-19（https://ispmbern.github.io/covid-19/living-review/index.html） | 5 |
| The COVID-19 Open Research Dataset | 2 |
| Internal COVID-19 literature database constructed by the RKI library | 2 |
| COVID-19 Clinical Trials registry | 2 |
| Covid19 reviews.org | 2 |
| National Institutes of Health (NIH) COVID-19 iSearch portfolio | 1 |
| Living mapping and living systematic review of COVID-19 studies (https://covid-nma.com/) | 1 |
| The Lancet’s A real-time dashboard of clinical trials for COVID-19 (https://www.thelancet.com/journals/landig/article/PIIS2589-7500(20)30086-8/fulltext) | 1 |

**Supplementary Tables 3 Search frequency of LSR for COVID-19**

| **Search frequency** | **Number** |
| --- | --- |
| every day | 3 |
| every week | 15 |
| every two weeks | 1 |
| every month | 10 |
| > one month | 4 |

**Supplementary Tables 4 Frequency of transitioning LSR out of living mode**

| **Transitioning LSR out of living mode** | **Number** |
| --- | --- |
| one year | 3 |
| two years | 10 |

**Supplementary Tables 5 Update frequency of LSR for COVID-19**

| **Update frequency** | **Number** |
| --- | --- |
| every week | 1 |
| every two weeks | 3 |
| every month | 6 |
| every two months | 2 |
| every three months | 5 |
| every four months | 2 |
| every six months | 4 |
| every year | 1 |

1. Siemieniuk RA, Bartoszko JJ, Ge L, et al. Drug treatments for covid-19: living systematic review and network meta-analysis *BMJ* 2020;370:m2980. doi: 10.1136/bmj.m2980 %/ © Author(s) (or their employer(s)) 2019. Re-use permitted under CC BY-NC. No commercial re-use. See rights and permissions. Published by BMJ.

2. Wynants L, Van Calster B, Collins GS, et al. Prediction models for diagnosis and prognosis of covid-19: Systematic review and critical appraisal *BMJ* 2020;369:m1328. doi: 10.1136/bmj.m1328 %/ BMJ Publishing Group (E-mail: subscriptions@bmjgroup.com)

3. Allotey J, Stallings E, Bonet M, et al. Clinical manifestations, risk factors, and maternal and perinatal outcomes of coronavirus disease 2019 in pregnancy: living systematic review and meta-analysis *BMJ* 2020;370:m3320. doi: 10.1136/bmj.m3320 %/ © Author(s) (or their employer(s)) 2019. Re-use permitted under CC BY-NC. No commercial re-use. See rights and permissions. Published by BMJ.

4. Allotey J, Chatterjee S, Kew T, et al. SARS-CoV-2 positivity in offspring and timing of mother-to-child transmission: living systematic review and meta-analysis. *Bmj* 2022;376:e067696. doi: 10.1136/bmj-2021-067696 [published Online First: 2022/03/18]

5. Bartoszko JJ, Siemieniuk RAC, Kum E, et al. Prophylaxis against covid-19: living systematic review and network meta-analysis. *Bmj* 2021;373:n949. doi: 10.1136/bmj.n949 [published Online First: 2021/04/28]

6. Siemieniuk RA, Bartoszko JJ, Díaz Martinez JP, et al. Antibody and cellular therapies for treatment of covid-19: a living systematic review and network meta-analysis. *Bmj* 2021;374:n2231. doi: 10.1136/bmj.n2231 [published Online First: 2021/09/25]

7. Hernandez AV, Roman YM, Pasupuleti V, et al. Hydroxychloroquine or Chloroquine for Treatment or Prophylaxis of COVID-19 A Living Systematic Review. *ANNALS OF INTERNAL MEDICINE* 2020;173(4):287-96. doi: 10.7326/m20-2496

8. Wilt TJ, Kaka AS, MacDonald R, et al. Remdesivir for Adults With COVID-19 : A Living Systematic Review for an American College of Physicians Practice Points. *Annals of internal medicine* 2020:209-20. doi: 10.7326/M20-5752 %/ NLM (Medline)

9. Mackey K, King VJ, Gurley S, et al. Risks and Impact of Angiotensin-Converting Enzyme Inhibitors or Angiotensin-Receptor Blockers on SARS-CoV-2 Infection in Adults: A Living Systematic Review. *Annals of internal medicine* 2020;173(3):195-203. doi: 10.7326/m20-1515 [published Online First: 2020/05/19]

10. Hernandez AV, Roman YM, Pasupuleti V, et al. Hydroxychloroquine or Chloroquine for Treatment or Prophylaxis of COVID-19: A Living Systematic Review. *Annals of internal medicine* 2020;173(4):287-96. doi: 10.7326/m20-2496 [published Online First: 2020/05/28]

11. Schunemann HJ, Khabsa J, Solo K, et al. Ventilation Techniques and Risk for Transmission of Coronavirus Disease, Including COVID-19: A Living Systematic Review of Multiple Streams of Evidence. *Annals of internal medicine* 2020;173(3):204-16. doi: 10.7326/M20-2306 %/ NLM (Medline)

12. Brümmer LE, Katzenschlager S, Gaeddert M, et al. Accuracy of novel antigen rapid diagnostics for SARS-CoV-2: A living systematic review and meta-analysis. *PLoS medicine* 2021;18(8):e1003735. doi: 10.1371/journal.pmed.1003735 [published Online First: 2021/08/13]

13. Buitrago-Garcia D, Egli-Gany D, Counotte MJ, et al. Occurrence and transmission potential of asymptomatic and presymptomatic SARS-CoV-2 infections: A living systematic review and meta-analysis. *PLoS medicine* 2020;17(9):e1003346. doi: 10.1371/journal.pmed.1003346 [published Online First: 2020/09/23]

14. Juul S, Nielsen EE, Feinberg J, et al. Interventions for treatment of COVID-19: A living systematic review with meta-analyses and trial sequential analyses (The LIVING Project). *PLoS medicine* 2020;17(9):e1003293. doi: 10.1371/journal.pmed.1003293 [published Online First: 2020/09/18]

15. Schlesinger S, Neuenschwander M, Lang A, et al. Risk phenotypes of diabetes and association with COVID-19 severity and death: a living systematic review and meta-analysis. *Diabetologia* 2021;64(7):1480-91. doi: 10.1007/s00125-021-05458-8 [published Online First: 2021/04/29]

16. Davidson M, Menon S, Chaimani A, et al. Interleukin-1 blocking agents for treating COVID-19. *The Cochrane database of systematic reviews* 2022;1(1):Cd015308. doi: 10.1002/14651858.Cd015308 [published Online First: 2022/01/27]

17. Ansems K, Grundeis F, Dahms K, et al. Remdesivir for the treatment of COVID-19. *The Cochrane database of systematic reviews* 2021;8(8):Cd014962. doi: 10.1002/14651858.Cd014962 [published Online First: 2021/08/06]

18. Deeks JJ, Dinnes J, Takwoingi Y, et al. Antibody tests for identification of current and past infection with SARS-CoV-2. *The Cochrane database of systematic reviews* 2020;6(6):Cd013652. doi: 10.1002/14651858.Cd013652 [published Online First: 2020/06/26]

19. Ghosn L, Chaimani A, Evrenoglou T, et al. Interleukin-6 blocking agents for treating COVID-19: a living systematic review. *The Cochrane database of systematic reviews* 2021;3(3):Cd013881. doi: 10.1002/14651858.Cd013881 [published Online First: 2021/03/19]

20. Salameh JP, Leeflang MM, Hooft L, et al. Thoracic imaging tests for the diagnosis of COVID-19. *The Cochrane database of systematic reviews* 2020;9:Cd013639. doi: 10.1002/14651858.CD013639.pub2 [published Online First: 2020/10/01]

21. Kreuzberger N, Hirsch C, Chai KL, et al. SARS-CoV-2-neutralising monoclonal antibodies for treatment of COVID-19. *The Cochrane database of systematic reviews* 2021;9(9):Cd013825. doi: 10.1002/14651858.CD013825.pub2 [published Online First: 2021/09/03]

22. Mikolajewska A, Fischer AL, Piechotta V, et al. Colchicine for the treatment of COVID-19. *The Cochrane database of systematic reviews* 2021;10(10):Cd015045. doi: 10.1002/14651858.Cd015045 [published Online First: 2021/10/19]

23. O'Byrne L, Webster KE, MacKeith S, et al. Interventions for the treatment of persistent post-COVID-19 olfactory dysfunction. *The Cochrane database of systematic reviews* 2021;7(7):Cd013876. doi: 10.1002/14651858.CD013876.pub2 [published Online First: 2021/07/23]

24. Valk SJ, Piechotta V, Chai KL, et al. Convalescent plasma or hyperimmune immunoglobulin for people with COVID-19: a rapid review. *The Cochrane database of systematic reviews* 2020;5(5):Cd013600. doi: 10.1002/14651858.Cd013600 [published Online First: 2020/05/15]

25. Stroehlein JK, Wallqvist J, Iannizzi C, et al. Vitamin D supplementation for the treatment of COVID-19: a living systematic review. *The Cochrane database of systematic reviews* 2021;5(5):Cd015043. doi: 10.1002/14651858.Cd015043 [published Online First: 2021/05/25]

26. Griesel M, Wagner C, Mikolajewska A, et al. Inhaled corticosteroids for the treatment of COVID-19. *The Cochrane database of systematic reviews* 2022;3(3):Cd015125. doi: 10.1002/14651858.Cd015125 [published Online First: 2022/03/10]

27. Wagner C, Griesel M, Mikolajewska A, et al. Systemic corticosteroids for the treatment of COVID-19. *The Cochrane database of systematic reviews* 2021;8(8):Cd014963. doi: 10.1002/14651858.Cd014963 [published Online First: 2021/08/17]

28. Webster KE, O'Byrne L, MacKeith S, et al. Interventions for the prevention of persistent post-COVID-19 olfactory dysfunction. *The Cochrane database of systematic reviews* 2021;7(7):Cd013877. doi: 10.1002/14651858.CD013877.pub2 [published Online First: 2021/07/23]

29. Qiu X, Nergiz AI, Maraolo AE, et al. The role of asymptomatic and pre-symptomatic infection in SARS-CoV-2 transmission-a living systematic review. *Clinical microbiology and infection : the official publication of the European Society of Clinical Microbiology and Infectious Diseases* 2021;27(4):511-19. doi: 10.1016/j.cmi.2021.01.011 [published Online First: 2021/01/24]

30. Langford BJ, So M, Raybardhan S, et al. Bacterial co-infection and secondary infection in patients with COVID-19: a living rapid review and meta-analysis. *Clinical microbiology and infection : the official publication of the European Society of Clinical Microbiology and Infectious Diseases* 2020;26(12):1622-29. doi: 10.1016/j.cmi.2020.07.016 [published Online First: 2020/07/28]

31. Tleyjeh IM, Kashour Z, Riaz M, et al. Efficacy and safety of tocilizumab in COVID-19 patients: a living systematic review and meta-analysis, first update. *Clinical microbiology and infection : the official publication of the European Society of Clinical Microbiology and Infectious Diseases* 2021;27(8):1076-82. doi: 10.1016/j.cmi.2021.04.019 [published Online First: 2021/04/30]

32. Amer YS, Titi MA, Godah MW, et al. International alliance and AGREE-ment of 71 clinical practice guidelines on the management of critical care patients with COVID-19: a living systematic review. *Journal of clinical epidemiology* 2022;142:333-70. doi: 10.1016/j.jclinepi.2021.11.010 [published Online First: 2021/11/18]

33. Harder T, Koch J, Vygen-Bonnet S, et al. Efficacy and effectiveness of COVID-19 vaccines against SARS-CoV-2 infection: interim results of a living systematic review, 1 January to 14 May 2021. *Euro surveillance : bulletin Europeen sur les maladies transmissibles = European communicable disease bulletin* 2021;26(28) doi: 10.2807/1560-7917.Es.2021.26.28.2100563 [published Online First: 2021/07/17]

34. Harder T, Külper-Schiek W, Reda S, et al. Effectiveness of COVID-19 vaccines against SARS-CoV-2 infection with the Delta (B.1.617.2) variant: second interim results of a living systematic review and meta-analysis, 1 January to 25 August 2021. *Euro surveillance : bulletin Europeen sur les maladies transmissibles = European communicable disease bulletin* 2021;26(41) doi: 10.2807/1560-7917.Es.2021.26.41.2100920 [published Online First: 2021/10/16]

35. Amorim Dos Santos J, Normando AGC, Carvalho da Silva RL, et al. Oral Manifestations in Patients with COVID-19: A 6-Month Update. *Journal of dental research* 2021;100(12):1321-29. doi: 10.1177/00220345211029637 [published Online First: 2021/07/30]

36. Hussain S, Riad A, Singh A, et al. Global Prevalence of COVID-19-Associated Mucormycosis (CAM): Living Systematic Review and Meta-Analysis. *Journal of fungi (Basel, Switzerland)* 2021;7(11) doi: 10.3390/jof7110985 [published Online First: 2021/11/28]

37. Elvidge J, Summerfield A, Nicholls D, et al. Diagnostics and Treatments of COVID-19: A Living Systematic Review of Economic Evaluations. *Value in health : the journal of the International Society for Pharmacoeconomics and Outcomes Research* 2022 doi: 10.1016/j.jval.2022.01.001 [published Online First: 2022/02/20]

38. Centeno-Tablante E, Medina-Rivera M, Finkelstein JL, et al. Transmission of SARS-CoV-2 through breast milk and breastfeeding: a living systematic review. *Ann N Y Acad Sci* 2020:32-54. doi: 10.1111/nyas.14477 %/ © 2020 The Authors. Annals of the New York Academy of Sciences. The World Health Organization retains copyright and all other rights in the manuscript of this article as submitted for publication.

39. Michelen M, Manoharan L, Elkheir N, et al. Characterising long COVID: a living systematic review. *BMJ global health* 2021;6(9) doi: 10.1136/bmjgh-2021-005427 [published Online First: 2021/09/29]

40. Kirkham AM, Monaghan M, Bailey AJM, et al. Mesenchymal stem/stromal cell-based therapies for COVID-19: First iteration of a living systematic review and meta-analysis: MSCs and COVID-19. *Cytotherapy* 2022 doi: 10.1016/j.jcyt.2021.12.001 [published Online First: 2022/02/28]

41. Zhang X, Shang L, Fan G, et al. The Efficacy and Safety of Janus Kinase Inhibitors for Patients With COVID-19: A Living Systematic Review and Meta-Analysis. *Frontiers in medicine* 2021;8:800492. doi: 10.3389/fmed.2021.800492 [published Online First: 2022/02/15]

42. Gómez-Ochoa SA, Franco OH, Rojas LZ, et al. COVID-19 in Health-Care Workers: A Living Systematic Review and Meta-Analysis of Prevalence, Risk Factors, Clinical Characteristics, and Outcomes. *American journal of epidemiology* 2021;190(1):161-75. doi: 10.1093/aje/kwaa191 [published Online First: 2020/09/02]

43. Dong F, Liu HL, Dai N, et al. A living systematic review of the psychological problems in people suffering from COVID-19. *Journal of affective disorders* 2021;292:172-88. doi: 10.1016/j.jad.2021.05.060 [published Online First: 2021/06/15]

44. Xu W, Li X, Dong Y, et al. SARS-CoV-2 transmission in schools: An updated living systematic review (version 2; November 2020). *Journal of global health* 2021;11:10004. doi: 10.7189/jogh.11.10004 [published Online First: 2021/11/23]

45. Bonardi O, Wang Y, Li K, et al. Effects of COVID-19 Mental Health Interventions Among Children, Adolescents, and Adults Not Quarantined or Undergoing Treatment Due to COVID-19 Infection: A Systematic Review of Randomised Controlled Trials. *Canadian journal of psychiatry Revue canadienne de psychiatrie* 2022;67(5):336-50. doi: 10.1177/07067437211070648 [published Online First: 2022/03/12]

46. Asiimwe IG, Pushpakom S, Turner RM, et al. Cardiovascular drugs and COVID-19 clinical outcomes: A living systematic review and meta-analysis. *British journal of clinical pharmacology* 2021;87(12):4534-45. doi: 10.1111/bcp.14927 [published Online First: 2021/06/09]

47. Bell V, Wade D. Mental health of clinical staff working in high-risk epidemic and pandemic health emergencies a rapid review of the evidence and living meta-analysis. *SOCIAL PSYCHIATRY AND PSYCHIATRIC EPIDEMIOLOGY* 2020:56(1):1-11. doi: 10.1007/s00127-020-01990-x

48. Soto-Cámara R, García-Santa-Basilia N, Onrubia-Baticón H, et al. Psychological Impact of the COVID-19 Pandemic on Out-of-Hospital Health Professionals: A Living Systematic Review. *Journal of clinical medicine* 2021;10(23) doi: 10.3390/jcm10235578 [published Online First: 2021/12/11]

49. Yang J, D'Souza R, Kharrat A, et al. Coronavirus disease 2019 pandemic and pregnancy and neonatal outcomes in general population: A living systematic review and meta-analysis (updated Aug 14, 2021). *Acta obstetricia et gynecologica Scandinavica* 2022;101(1):7-24. doi: 10.1111/aogs.14277 [published Online First: 2021/11/04]

50. Korang SK, von Rohden E, Veroniki AA, et al. Vaccines to prevent COVID-19: A living systematic review with Trial Sequential Analysis and network meta-analysis of randomized clinical trials. *PloS one* 2022;17(1):e0260733. doi: 10.1371/journal.pone.0260733 [published Online First: 2022/01/22]

51. Melo AKG, Milby KM, Caparroz A, et al. Biomarkers of cytokine storm as red flags for severe and fatal COVID-19 cases: A living systematic review and meta-analysis. *PloS one* 2021;16(6):e0253894. doi: 10.1371/journal.pone.0253894 [published Online First: 2021/06/30]

52. Ceravolo MG, Andrenelli E, Arienti C, et al. Rehabilitation and COVID-19: rapid living systematic review by Cochrane Rehabilitation Field - third edition. Update as of June 30th, 2021. *European journal of physical and rehabilitation medicine* 2021;57(5):850-57. doi: 10.23736/s1973-9087.21.07301-9 [published Online First: 2021/11/10]

53. Dzinamarira T, Nkambule SJ, Hlongwa M, et al. Risk factors for COVID-19 infection among healthcare workers. A first report from a living systematic review and meta-analysis. *Safety and health at work* 2022 doi: 10.1016/j.shaw.2022.04.001 [published Online First: 2022/04/19]

54. Silveira FM, Mello ALR, da Silva Fonseca L, et al. Morphological and tissue-based molecular characterization of oral lesions in patients with COVID-19: A living systematic review. *Archives of oral biology* 2022;136:105374. doi: 10.1016/j.archoralbio.2022.105374 [published Online First: 2022/02/19]

55. Cares-Marambio K, Montenegro-Jiménez Y, Torres-Castro R, et al. Prevalence of potential respiratory symptoms in survivors of hospital admission after coronavirus disease 2019 (COVID-19): A systematic review and meta-analysis. *Chronic respiratory disease* 2021;18:14799731211002240. doi: 10.1177/14799731211002240 [published Online First: 2021/03/18]

56. Bwire GM, Njiro BJ, Mwakawanga DL, et al. Possible vertical transmission and antibodies against SARS-CoV-2 among infants born to mothers with COVID-19: A living systematic review *Journal of Medical Virology* 2020:1361-69. doi: 10.1002/jmv.26622 %/ John Wiley and Sons Inc

57. Rocha A, Atallah ÁN, Pinto A, et al. COVID-19 and patients with immune-mediated inflammatory diseases undergoing pharmacological treatments: a rapid living systematic review *Sao Paulo Med J* 2020;138(6):515-20. doi: 10.1590/1516-3180.2020.0421.R2.10092020

58. Baladia E, Pizarro AB, Ortiz-Muñoz L, et al. Vitamin C for COVID-19: A living systematic review. *Medwave* 2020;20(6):e7978. doi: 10.5867/medwave.2020.06.7978 [published Online First: 2020/08/08]

59. John A, Eyles E, Webb RT, et al. The impact of the COVID-19 pandemic on self-harm and suicidal behaviour: update of living systematic review. *F1000Research* 2020;9:1097. doi: 10.12688/f1000research.25522.2 [published Online First: 2021/07/22]

60. Maguire BJ, McLean ARD, Rashan S, et al. Baseline results of a living systematic review for COVID-19 clinical trial registrations. *Wellcome open research* 2020;5:116. doi: 10.12688/wellcomeopenres.15933.1 [published Online First: 2020/11/07]

61. Rada G, Corbalán J, Rojas P. Cell-based therapies for COVID-19: A living, systematic review. *Medwave* 2020;20(11):e8079. doi: 10.5867/medwave.2020.11.8078 [published Online First: 2021/01/01]

62. Verdejo C, Vergara-Merino L, Meza N, et al. Macrolides for the treatment of COVID-19: a living, systematic review. *Medwave* 2020;20(11):e8074. doi: 10.5867/medwave.2020.11.8073 [published Online First: 2020/12/29]

63. Verdugo-Paiva F, Acuña MP, Solá I, et al. Remdesivir for the treatment of COVID-19: a living systematic review. *Medwave* 2020;20(11):e8080. doi: 10.5867/medwave.2020.11.8080 [published Online First: 2020/12/29]

64. Verdugo-Paiva F, Izcovich A, Ragusa M, et al. Lopinavir-ritonavir for COVID-19: A living systematic review. *Medwave* 2020;20(6):e7967. doi: 10.5867/medwave.2020.06.7966 [published Online First: 2020/07/18]
